# Supplementary material for: An SPE-assisted BODIPY fluorometric paper sensor for the highly selective and sensitive determination of Cd2+ in complex sample: rice
Source: Royal Society of Chemistry journal article supplement (doi:10.1039/c4an00198b), 2014-01-01
Supplement: c4an00198b1.pdf [file c4an00198b1.pdf]

***Supplementary Information:***

**A SPE-assisted BODIPY fluorometric paper sensor for the highly selective and sensitive determination of Cd<sup>2+</sup> in complex sample: rice**

Yu Zhang,<sup>a</sup> Hui Li,<sup>a</sup> Liya Niu,<sup>b</sup> Qingzheng Yang,<sup>b\*</sup> Yafeng Guan,<sup>a</sup> and Liang Feng<sup>a\*</sup>

<sup>a</sup> Key Laboratory of Separation Science for Analytical Chemistry, Dalian Institute of Chemical Physics, Chinese Academy of Sciences, Dalian, Liaoning 116023, P. R. China

<sup>b</sup> Key Lab of Photochemical Conversion and Optoelectronic Materials, Technical Institute of Physics and Chemistry, Chinese Academy of Sciences, Beijing 100190, P. R. China

---

\*Corresponding author.

Fax: (+86)-411-84379411

E-mail: [fengl@dicp.ac.cn](mailto:fengl@dicp.ac.cn); [qzyang@mail.ipc.ac.cn](mailto:qzyang@mail.ipc.ac.cn).

### Text S1. Rice digestion procedures.

1 g of each rice sample was accurately weighed and predigested in 5 mL nitric acid (65%) overnight. The mixture was averagely introduced into 5 digestion tanks and then 11 mL of nitric acid (65%) and 1 mL of hydrogen peroxide solution (30%) were replenished into each tank. These closed vessels were immediately exposed to microwave irradiation using a MDA-6-G microwave oven (Shanghai, China) (running program was listed below). The digested solution was heated to just before dryness on a hotplate. Further evaporation after adding deionized water was also performed for 3 or 4 times to reach solution pH 5-6. The resulting solution was made up to 5 mL and purified by 0.22  $\mu$ m Millipore membrane followed by C18 column.

Running program for microwave oven.

|   | Temperature,<br>$^{\circ}$ C | Time, min | Power, W |
|---|------------------------------|-----------|----------|
| 1 | 130                          | 15        | 600      |
| 2 | 150                          | 10        | 600      |
| 3 | 180                          | 50        | 600      |

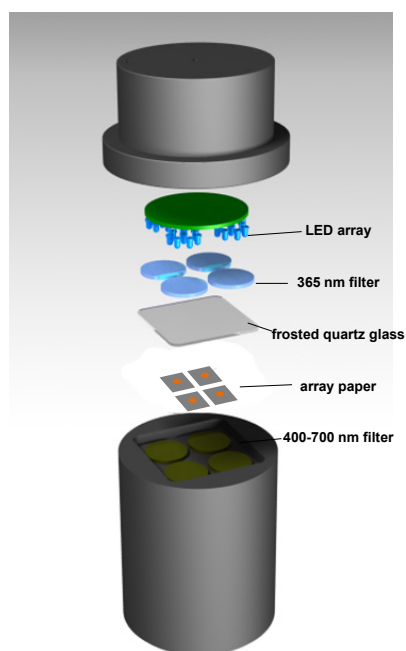

**Figure S1.** The schematic graph of the experimental setup.

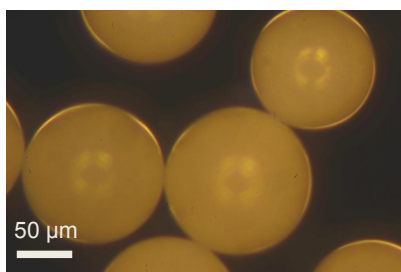

**Figure S2.** Optical microscope image of commercially available PS-DVB microspheres.

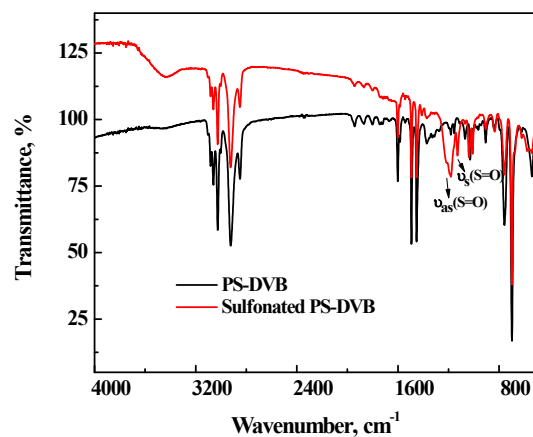

**Figure S3.** FTIR spectra of PS-DVB microspheres and their sulfonated forms.

39

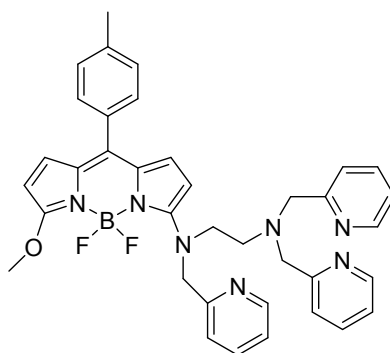

40

41  $^1\text{H}$  NMR (400 MHz,  $\text{CDCl}_3$ ):  $\delta$  8.49 (m, 3H), 7.60 (m, 3H), 7.50 (d, 2H,  $J = 7.6$  Hz), 7.36 (d, 1H,  
 42  $J = 8.0$  Hz), 7.32 (d, 2H,  $J = 8.0$  Hz), 7.24 (d, 2H,  $J = 8.0$  Hz), 7.12 (m, 3H), 6.59 (d, 1H,  $J = 4.8$   
 43 Hz), 6.40 (d, 1H,  $J = 4.0$  Hz), 5.91 (d, 1H,  $J = 4.8$  Hz), 5.69 (d, 1H,  $J = 4.0$  Hz), 5.14 (s, 2H),  
 44 3.98 (s, 3H), 3.87 (m, 2H), 3.85 (s, 4H), 2.90 (t, 2H,  $J = 6.4$  Hz), 2.43 (s, 3H). ESI-HRMS:  
 45 calculated for  $[\text{M}+\text{H}]^+$  644.31215, found 644.31118.

46

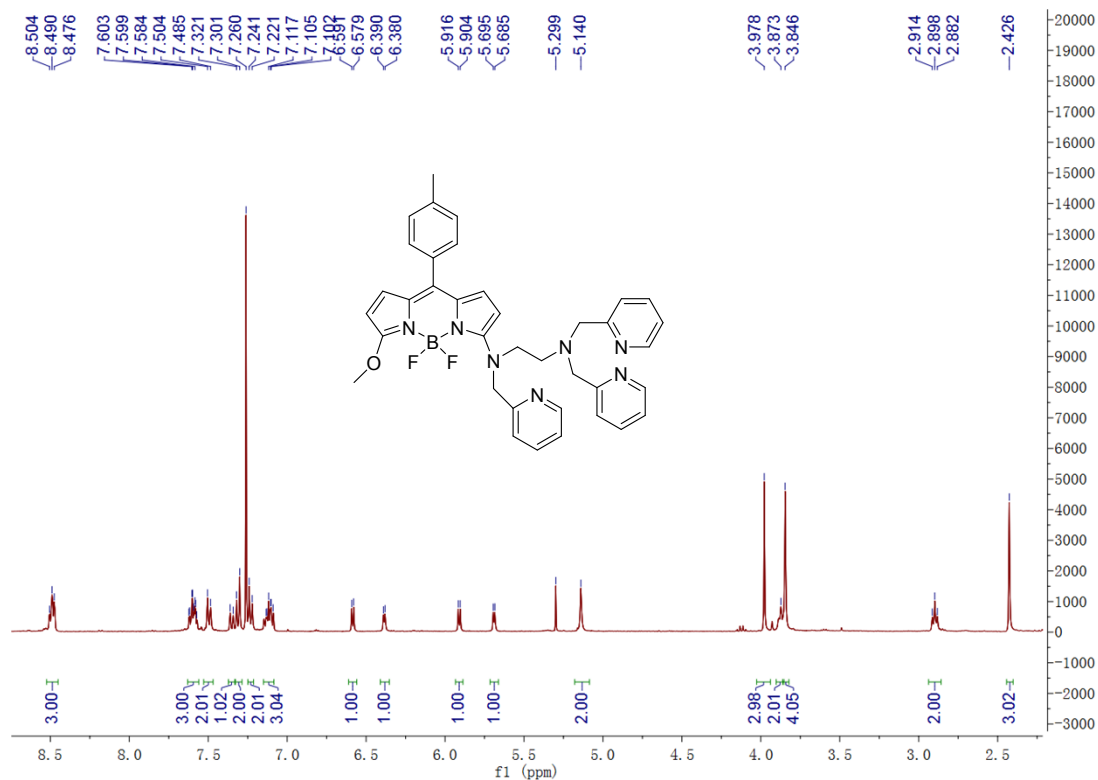

47

48

49

**Figure S4.** Chemical structure and characterization information of the synthesized indicator.

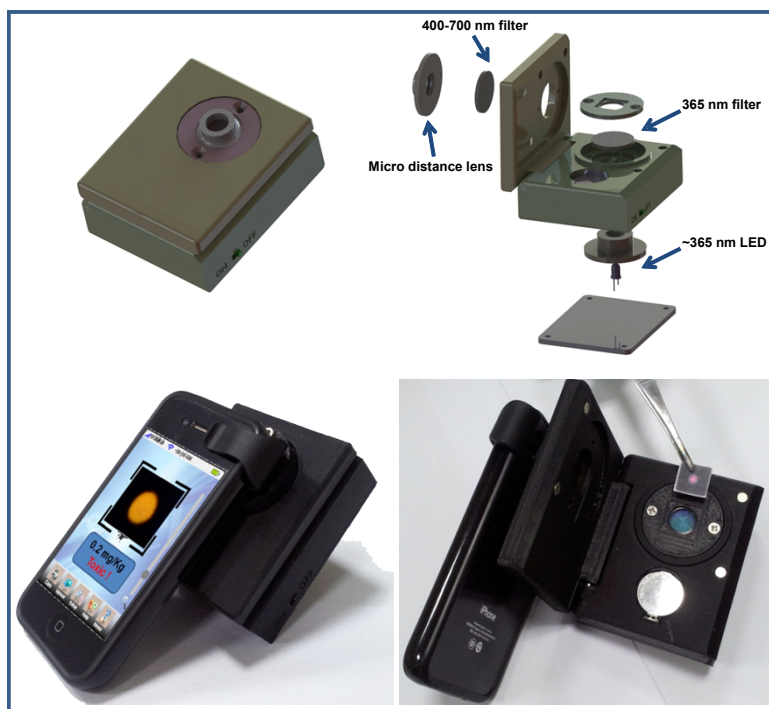

**Figure S5.** Constructed equipment for BODIPY-based fluorometric paper sensor.

53

**Table S1.** Metal ions concentrations (mg/Kg) in 12 digested rice samples detected by IC.

|      | Cu <sup>2+</sup> | Ni <sup>2+</sup> | Zn <sup>2+</sup> | Cd <sup>2+</sup> | Mn <sup>2+</sup> | Na <sup>+</sup> | K <sup>+</sup> | Mg <sup>2+</sup> | Ca <sup>2+</sup> |
|------|------------------|------------------|------------------|------------------|------------------|-----------------|----------------|------------------|------------------|
| 1#   | 1.18             | n.d <sup>a</sup> | 9.75             | n.d.             | 5.82             | 49.41           | 451.82         | 141.77           | 254.65           |
| 2#   | 3.87             | 0.50             | 4.52             | n.d.             | 3.16             | 47.72           | 251.07         | 82.17            | 104.92           |
| 3#   | 1.40             | n.d              | 2.81             | n.d.             | 3.20             | 17.65           | 280.89         | 78.82            | 68.44            |
| 4#   | 1.14             | n.d              | 6.70             | n.d.             | 5.64             | 52.89           | 531.50         | 202.57           | 146.05           |
| 5#   | 3.22             | 1.92             | 3.31             | n.d.             | 3.55             | 106.92          | 791.19         | 176.93           | 147.71           |
| 6#   | 0.57             | n.d              | 2.07             | n.d.             | 0.73             | 60.92           | 1184.06        | 321.80           | 353.05           |
| 7#   | 2.04             | n.d              | 16.42            | n.d.             | 7.38             | 60.99           | 1096.06        | 381.64           | 420.62           |
| 8#   | 1.04             | n.d              | 3.60             | n.d.             | 2.82             | 35.35           | 470.98         | 107.60           | 118.07           |
| 9#   | 2.17             | 2.58             | 14.45            | n.d.             | 7.35             | 25.00           | 182.95         | 99.97            | 245.80           |
| 10#  | 1.68             | 8.74             | n.d              | n.d.             | 1.66             | 68.72           | 1065.29        | 419.14           | 180.29           |
| 11#  | 0.39             | n.d              | n.d              | n.d.             | 2.53             | 123.67          | 1414.16        | 1188.3<br>4      | 1093.68          |
| 12#  | 0.54             | 0.91             | 14.89            | n.d.             | 9.91             | 30.78           | 584.40         | 247.36           | 149.60           |
| Mean | 1.60             | 1.22             | 6.54             | n.d.             | 4.48             | 56.67           | 692.03         | 287.34           | 273.57           |

54

<sup>a</sup> n.d. means not detected.

55

56

57

**Table S2.** Instrument parameters of ICP-MS for Cd<sup>2+</sup> determination.

| Parameter                      | Value |
|--------------------------------|-------|
| Plasma gas flow rate, L/min    | 15    |
| Auxiliary gas flow rate, L/min | 0.2   |
| Nebulizer gas flow rate, L/min | 0.8   |
| Plasma power, W                | 1300  |
| Sample flow rate, L/min        | 1.5   |
| Analysis time, min             | 4.6   |

58
